# Supplementary material for: The Integrated Behavioural Model for Water, Sanitation, and Hygiene: a systematic review of behavioural models and a framework for designing and evaluating behaviour change interventions in infrastructure-restricted settings
Source: PubMed Central journal article supplement (PMC4231350; doi:10.1186/1471-2458-13-1015), 2013-10-26
Supplement: 1471-2458-13-1015-S1.pdf [file 1471-2458-13-1015-S1.pdf]

# **IBM-WASH**

**Integrated Behavioral Model for  
Water, Sanitation and Hygiene**

# **Reasons for creating IBM-WASH**

# Purposes of a model (1)

- ◆ The model described social and behavioral factors that affect adoption of water and sanitation behaviors such as:
  - Handwashing with soap
  - Chlorination of drinking water in the home
  - Construction, maintenance and use of latrines

# Purposes of a model (2)

- ◆ Purposes of the model include:
  - Identification of factors to investigate in qualitative research that describes the reasons for WASH behaviors
  - Design of interventions to promote WASH behaviors
  - Design of data collection instruments to measure the effect of interventions on determinants of WASH behaviors

# Why create yet another model?

- ◆ Other models are often specific to one behavior e.g. only for handwashing
- ◆ The technology (point of use water treatments, handwashing stations etc.) is rarely included in other models
  - Characteristics of the technology that favor or constrain adoption and use
  - People's responses to the technology
- ◆ Different levels of influence not acknowledged in many other models

# **IBM-WASH: Organization of the framework**

## Levels

Societal /  
Structural

Community

Interpersonal/  
Household

Individual

Habitual

Contextual

Psychosocial

“Software”

Product/  
Technology

“Hardware”

**Three columns  
or dimensions**



## Levels

Societal /  
Structural

Community

Interpersonal/  
Household

Individual

Habitual

## Contextual

Psychosocial  
“Software”

Product/  
Technology  
“Hardware”

**Five rows or levels**





# **How we created IBM-WASH**

# Creating IBM-WASH

- ◆ We conducted a systematic review to find all existing models and frameworks of factors that affect adoption of WASH behaviors

# Search strategy

- ◆ {Terms related to behavior change models and constructs}
- ◆ AND
- ◆ {Terms related to WASH}

# Terms related to behavior change models and constructs

- ◆ health belief model OR social learning theory OR social cognitive theory OR conceptual model OR theory of reasoned action OR theory of planned behavior OR stages of change OR prochaska OR self-efficacy OR disgust OR shame OR psychological determinants OR behavioral determinants OR decision making

# Terms related to WASH

- ◆ water OR soap OR handwashing OR latrine OR sanitation OR chlorine OR filter
- ◆ We left out (too many off-topic articles):
  - Defecation
  - Feces

# Results of search

- ◆ Initial search: 931 references
- ◆ Reviewed abstracts, retained 49 references
- ◆ Identified 11 behavior change models or frameworks
  - Some explicit
  - Some implicit

# 10 references met 3 criteria

1. Presentation of factors affecting individual or household-level WASH behaviours
2. Draw from one or more existing behaviour change models to summarize these factors, and
3. Framework relates to WASH behaviours practiced in a community setting, rather than to an institution (hospital, clinic) or private sector employer (restaurant, food services)

# Eight retained models

| <b>Authors</b>     | <b>WASH behaviors</b>     | <b>Elements in model</b>                                                                       |
|--------------------|---------------------------|------------------------------------------------------------------------------------------------|
| Rainey and Harding | Household water treatment | Health Belief Model: individual perceptions, perceived severity, perceived susceptibility      |
| Curtis et al.      | Handwashing               | Planning, motivations and habits                                                               |
| Figueroa & Kincaid | Handwashing               | Indiv, HH & Comm levels<br>Cognitive elements, emotional factors, social interactions          |
| FOAM, SaniFOAM     | Handwashing, sanitation   | Opportunity, ability, motivation                                                               |
| Wood et al.        | Filters in Malawi         | Prochaska: Stages of Change                                                                    |
| Jenkins & Scott    | Sanitation in Ghana       | Prochaska: Stages of Change                                                                    |
| Mosler             | WASH practices (general)  | Risk factors, Attitudinal factors, Normative Factors, Ability Factors, Self-regulation Factors |
| EHP et al.         | Diarrhea prevention       | Access to hardware, Hygiene Promotion, Enabling Environment                                    |



# **Training people to use IBM- WASH in their work**

# Training people to use IBM-WASH in their work

- ◆ The meaning of each row and column may not be intuitive to people
- ◆ When introducing the model to a new group of people, we have found it necessary to take them through an exercise of deciding where different factors should go: which row and which column
- ◆ What follows is such an exercise, for use in training people on IBM-WASH

# **IBM-WASH**

**Questions on classification of factors by dimension (column)**

## Levels

**Societal /  
Structural**

**Community**

**Interpersonal/  
Household**

**Individual**

**Habitual**

## Contextual

Policy and regulations, climate  
and geography

Access to markets, access to  
resources, built and physical  
environment

Roles and responsibilities,  
household structure, division  
of labor

Wealth, age, education,  
gender, livelihoods/  
employment

Favorable environment for  
habit formation, opportunity  
for and barriers to repetition  
of behavior

## Psychosocial “Software”

Leadership / advocacy,  
cultural identity

Shared values, collective  
efficacy, social integration,  
stigma

Injunctive norms, descriptive  
norms, aspirations, shame

Self efficacy, knowledge,  
disgust, perceived threat

Existing water and sanitation  
habits, outcome expectations

## Product/ Technology “Hardware”

Manufacturing, financing and  
distribution of the product,  
current and past national  
policies and promotion of  
products

Location, access, availability,  
individual vs. collective  
ownership/access and  
maintenance of the product

Sharing of access to product,  
modeling/ demonstration of  
use of product

Strengths and weaknesses of  
technology for end-users,  
adaptation of design to  
respond to consumer  
preferences

Ease / Effectiveness of routine  
use of product

# How do you decide which dimension/column?

- ◆ The factor cannot be addressed through an intervention e.g. high population density
  - Contextual
- ◆ The factor can be addressed by talking to people, changing their knowledge, skills, perceptions
  - Psychosocial
- ◆ The factor can be addressed by changing the technology e.g. changing volume of the reservoir, color of reservoir
  - Technology

# **Societal/structure level:**

## **Contextual, Psychosocial or Technology?**

- ◆ Handwashing station design is hard to manufacture, must be imported
- ◆ National law requiring that every restaurant have a sink with running water or a handwashing station for customers
- ◆ Commitment and dedication of national government to promoting handwashing
- ◆ National law – no tax on soap
- ◆ Three local companies exist that can manufacture handwashing stations

# **Societal/structure level:**

## **Contextual, Psychosocial or Technology?**

- ◆ Handwashing station design is hard to manufacture, must be imported (T)
- ◆ National law requiring that every restaurant have a sink with running water or a handwashing station for customers (C)
- ◆ Commitment and dedication of national government to promoting handwashing (P)
- ◆ National law – no tax on soap (C)
- ◆ Three local companies exist that can manufacture handwashing stations (C)

# Community level:

## Contextual, Psychosocial or Technology?

- ◆ Collective efficacy to control cholera epidemics through handwashing
- ◆ Water shortages, running water available only 3 hours per day
- ◆ Commitment by community organization to promoting handwashing
- ◆ Range of different housing types in community, different HWS designs needed
- ◆ Social norms for handwashing



# Community level:

## Contextual, Psychosocial or Technology?

- ◆ Collective efficacy to control cholera epidemics through handwashing (P)
- ◆ Water shortages, running water available only 3 hours per day (C)
- ◆ Commitment by community organization to promoting handwashing (P)
- ◆ Range of different housing types in community, different HWS designs needed for each housing type (C)
- ◆ Social norms for handwashing (P)

# **Interpersonal/household level:**

## **Contextual, Psychosocial or Technology?**

- ◆ Collective vs. individual responsibility for maintenance of the product and purchase of soap
- ◆ Shame if neighbor sees that you don't wash your hands
- ◆ Large average household size, makes it difficult to share handwashing station
- ◆ Design of handwashing station means 3 people can use at one time

# Interpersonal/household level:

## Contextual, Psychosocial or Technology?

- ◆ Collective vs. individual responsibility for maintenance of the product and purchase of soap (P)
- ◆ Shame if neighbor sees that you don't wash your hands (P)
- ◆ Large average household size, makes it difficult to share handwashing station (C)
- ◆ Design of handwashing station means 3 people can use at one time (T)

# Individual level:

## Contextual, Psychosocial or Technology?

- ◆ People do not find the handwashing station attractive due to its color
- ◆ Self-efficacy to use handwashing station
- ◆ Handwashing station is expensive, due to more durable type of plastic used
- ◆ Perception that handwashing station is expensive
- ◆ Women work in garment factories, no time to refill HWS with water

# Individual level:

## Contextual, Psychosocial or Technology?

- ◆ People do not find the handwashing station attractive due to its color (T)
- ◆ Self-efficacy to use handwashing station (P)
- ◆ Handwashing station is expensive, due to more durable type of plastic used (T)
- ◆ Perception that handwashing station is expensive (P)
- ◆ Women work in garment factories, no time to refill HWS with water (C)

# Habitual level:

## Contextual, Psychosocial or Technology?

- ◆ Ease of using handwashing station
- ◆ Perceived benefits from using HWS
- ◆ No one is present during the day due to work, no opportunity to develop habit of using the handwashing station
- ◆ Existing handwashing habits

# Habitual level:

## Contextual, Psychosocial or Technology?

- ◆ Ease of using handwashing station (T)
- ◆ Perceived benefits from using HWS (P)
- ◆ No one is present during the day due to work, no opportunity to develop habit of using the handwashing station (C)
- ◆ Existing handwashing habits (P)

# **IBM-WASH**

**Questions on classification of  
factors by level (row)**



## Levels

**Societal /  
Structural**

**Community**

**Interpersonal/  
Household**

**Individual**

**Habitual**

## Contextual

Policy and regulations, climate  
and geography

Access to markets, access to  
resources, built and physical  
environment

Roles and responsibilities,  
household structure, division  
of labor

Wealth, age, education,  
gender, livelihoods/  
employment

Favorable environment for  
habit formation, opportunity  
for and barriers to repetition  
of behavior

## Psychosocial “Software”

Leadership / advocacy,  
cultural identity

Shared values, collective  
efficacy, social integration,  
stigma

Injunctive norms, descriptive  
norms, aspirations, shame

Self efficacy, knowledge,  
disgust, perceived threat

Existing water and sanitation  
habits, outcome expectations

## Product/ Technology “Hardware”

Manufacturing, financing and  
distribution of the product,  
current and past national  
policies and promotion of  
products

Location, access, availability,  
individual vs. collective  
ownership/access and  
maintenance of the product

Sharing of access to product,  
modeling/ demonstration of  
use of product

Strengths and weaknesses of  
technology for end-users,  
adaptation of design to  
respond to consumer  
preferences

Ease / Effectiveness of routine  
use of product

# How do you decide which level/row?

- ◆ To address the situation, you have to talk to policy makers/decision-makers in national, regional and district governments, owners of private enterprises, donor organizations:  
Changing laws and policies, increasing funding
  - Societal/structural
- ◆ To address the situation, you have to work with community groups/NGOs, local governments, women's groups: Community mobilization and empowerment, local capacity-building, CLTS (commitment to ending open defecation)
  - Community

# How do you decide which level/row?

- ◆ To address the situation, you need to change how people are interacting with each other, how people divide up the work/responsibilities, how the household is organized: Household visits, counseling, negotiation of roles and responsibilities
  - Interpersonal/Household
- ◆ To address the situation, you need to increase individual knowledge, skills, perceptions
  - Individual

# How do you decide which level/row? – **Habitual**

- ◆ To address the situation, you need to consider the behavioral recommendations, and the attributes of the recommended behaviors: Complexity of performing the behavior, how often does the behavior need to be practiced, are there visible benefits to practicing the behavior
- ◆ To address the situation, you need to ensure that the environment and the technology are conducive to habit formation: Cues to behavior, ease of repetition of the behavior, stable environment for performing the behavior

# Contextual dimension:

## Which level/row?

- ◆ Given local work routines (leaving early in morning to go to garment factory), it is difficult to use the handwashing station regularly
- ◆ Average household size is large, so many people need to share each handwashing station
- ◆ There is a national policy that all restaurants need a handwashing station (HWS)
- ◆ Community groups are very strong, and could help with promotion of HWS

# Contextual dimension:

## Which level/row?

- ◆ Given local work routines (leaving early in morning to go to garment factory), it is difficult to use the handwashing station regularly (Beh/Hab)
- ◆ Average household size is large, so many people need to share each handwashing station (Interp/Household)
- ◆ There is a national policy that all restaurants need a handwashing station (Societal/structural)
- ◆ Community groups are very strong, and could help with promotion of HWS (Community)

# Psychosocial dimension:

## Which level/row?

- ◆ “If I don’t use the handwashing station, my neighbors will think I am a bad person”
- ◆ After a participatory exercise facilitated by a local NGO, the entire community made a commitment to use handwashing stations
- ◆ HWS not used, no agreement within household on maintenance & purchase of soap
- ◆ If I use the handwashing station regularly, I will have less diarrhea and my hands will smell clean

# Psychosocial dimension:

## Which level/row?

- ◆ “If I don’t use the handwashing station, my neighbors will think I am a bad person” (Interp.)
- ◆ After a participatory exercise facilitated by a local NGO, the entire community made a commitment to use handwashing stations (Comm)
- ◆ HWS not used, no agreement within household on maintenance & purchase of soap (Interpersonal/household)
- ◆ If I use the handwashing station regularly, I will have less diarrhea and my hands will smell clean (Behavioral/habitual)



# Technology dimension:

## Which level/row?

- ◆ HWS functions as a cue to practice handwashing
- ◆ HWS expensive because of the type of plastic
- ◆ HWS are easy to use
- ◆ People like HWS because they are attractive
- ◆ HWS are so large that they do not fit in the typical house, must be kept outside
- ◆ HWS can be sold at the local market
- ◆ Volume of HWS reservoir appropriate given number of users, and amount of water each used per day

# Technology dimension:

## Which level/row?

- ◆ HWS functions as a cue to practice handwashing (Habitual)
- ◆ HWS expensive because of type of plastic (Soc)
- ◆ HWS are easy to use (Habitual)
- ◆ People like HWS because they are attractive (Ind)
- ◆ HWS are so large that they do not fit in the typical house, must be kept outside (Inter/HH)
- ◆ HWS can be sold at the local market (Comm)
- ◆ Volume of HWS reservoir appropriate given number of users, and amount of water each used per day (Interpersonal/household)

# **Application to child potties**

# Levels

**Societal / Structural**

**Community**

**Interpersonal/ Household**

**Individual**

**Habitual**

# Technology

## “Hardware”

**Manufacturing, financing and distribution of the product, current and past national policies and promotion of products**

**Location, access, availability, individual vs. collective ownership/access and maintenance of the product**

**Sharing of access to product, modeling/ demonstration of use of product**

**Strengths and weaknesses of technology for end-users, adaptation of design to respond to consumer preferences**

**Ease / Effectiveness of routine use of product**

# Levels

**Societal / Structural**

**Community**

**Interpersonal/ Household**

**Individual**

**Habitual**

# Technology: Child potties

Manufacturing, financing and distribution of child potties, national policies and promotion of child potties

Availability and distribution of child potties in the community

Sharing of access to product, modeling/ demonstration of use of product

Strengths and weaknesses of child potties for end-users, adaptation of design to respond to consumer preferences

Ease / Effectiveness of routine use of child potties, need for potty training. Visible potty as cue to action for potty use.

# Levels

**Societal / Structural**

**Community**

**Interpersonal/ Household**

**Individual**

**Habitual**

# Psychosocial “Software”

**Leadership / advocacy, cultural identity**

**Shared values, collective efficacy, social integration, stigma**

**Injunctive norms, descriptive norms, aspirations, shame**

**Self efficacy, knowledge, disgust, perceived threat**

**Existing water and sanitation habits, outcome expectations**

# Levels

**Societal / Structural**

**Community**

**Interpersonal/ Household**

**Individual**

**Habitual**

# Psychosocial: Child potties

Leadership / advocacy for use of child potties

Shared values, collective efficacy for community-wide use of potties

Injunctive norms, descriptive norms for child potty use.  
Responsibility for cleaning potty at household level

Self efficacy for potty training of child and correct use of potty. Knowledge of diarrheal diseases. Disgust and perceived threat related to child feces in the household or courtyard

Existing habits for disposal of child feces. Outcome expectations: What is the expected outcome of consistent potty use by the child?

# Levels

**Societal / Structural**

**Community**

**Interpersonal/ Household**

**Individual**

**Habitual**

# Contextual

**Policy and regulations, climate and geography**

**Access to markets, access to resources, built and physical environment**

**Roles and responsibilities, household structure, division of labor**

**Wealth, age, education, gender, livelihoods/ employment**

**Favorable environment for habit formation, opportunity for and barriers to repetition of behavior**



# Levels

**Societal / Structural**

**Community**

**Interpersonal/ Household**

**Individual**

**Habitual**

# Contextual: Child potties

Climate and geography: Rainy and dry seasons and their effect on child defecation habits. Type of soil

Access to latrines, sewers, potable water in the community

Household members and division of labor related to child care and disposal of child feces. Condition of the latrine

Wealth, education and employment of caretaker of child. Age and developmental stage of child and their effect on potty use

Favorable environment for formation potty using habit, and regular emptying of potty
